# Supplementary material for: Antitumor Activity and Mechanism of Action of Hormonotoxin, an LHRH Analog Conjugated to Dermaseptin-B2, a Multifunctional Antimicrobial Peptide
Source: MDPI journal article supplement (doi:10.3390/ijms222111303), 2021-10-20
Supplement: s1 [file s1]

# SUPPLEMENTARY DATA

## Antitumor activity and mechanism of action of the Hormonotoxin, an LHRH analog conjugated to Dermaseptin-B2, a multifunctional antimicrobial peptide.

Mickael Couty<sup>1</sup>, Marie Dusaud<sup>1¶</sup>, Mickael Miro-Padovani<sup>1¶</sup>, Liuhui Zhang<sup>1¶</sup>, Patricia Zadigue<sup>1</sup>, Loussiné Zargarian<sup>2</sup>, Olivier Lequin<sup>3</sup>, Alexandre De La Taille<sup>1</sup>, Jean Delbe<sup>1</sup>, Yamina Hama-Kourbali<sup>1, &</sup> and Mohamed Amiche<sup>1, 4&\*</sup>.

<sup>1.</sup> Université Paris Est Créteil, INSERM, IMRB, F-94010 Créteil, France ; mickael.couty@inserm.fr (MA); marie.dussaud@gmail.com (MD); mickael.miro-padovani@aphp.fr (MMP); quingfengxu0716@126.com (LZ); zadigue@gmail.com(PZ); adelataille@hotmail.com (ADLT); delbe@u-pec.fr (JD); hamma@u-pec.fr (YHK); mohamed.amiche@sorbonne-universite.fr (MA)

<sup>2.</sup> LBPA, CNRS UMR 8113 École Normale Supérieure Paris-Saclay, 4 Avenue des Sciences, 91190 Gif-sur-Yvette, France; loussine.zargarian@ens-cachan.fr (LZ)

<sup>3.</sup> Sorbonne Université, École Normale Supérieure, PSL University, CNRS, Laboratoire des Biomolécules (LBM), 75005 Paris, France : olivier.lequin@upmc.fr (OL)

<sup>4</sup> Current Address : Sorbonne Université, CNRS, Institut de Biologie Paris-Seine, IBPS, BIOSIPE, F-75252 Paris, France : mohamed.amiche@sorbonne-universite.fr (MA)

\* Correspondence: mohamed.amiche@sorbonne-universite.fr (MA)

¶ These authors have contributed equally

& YHK and MA are joint senior authors

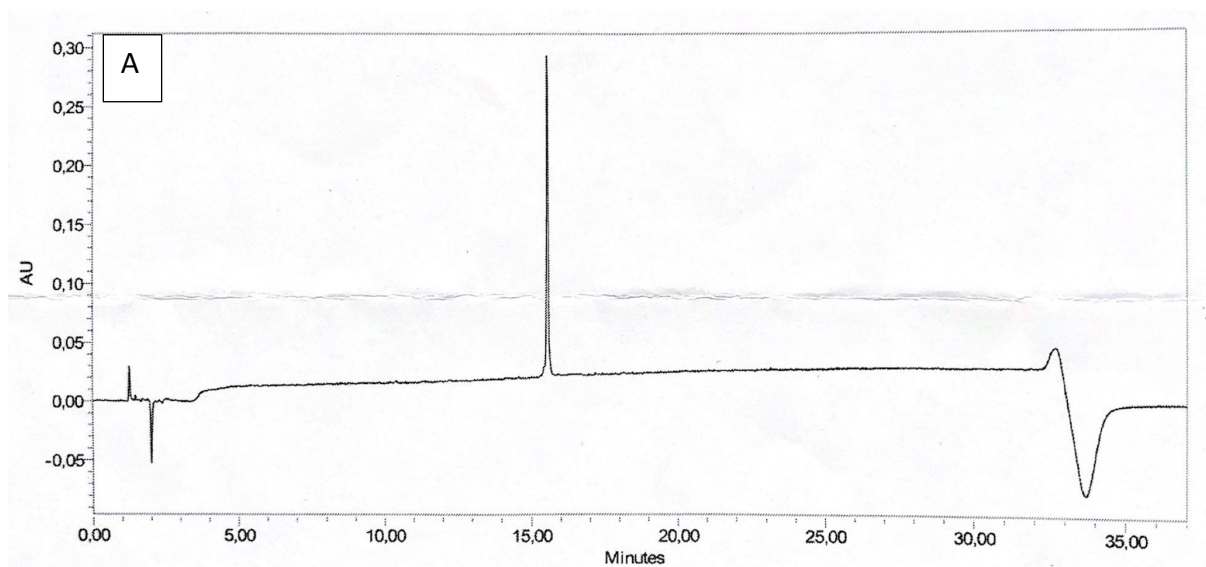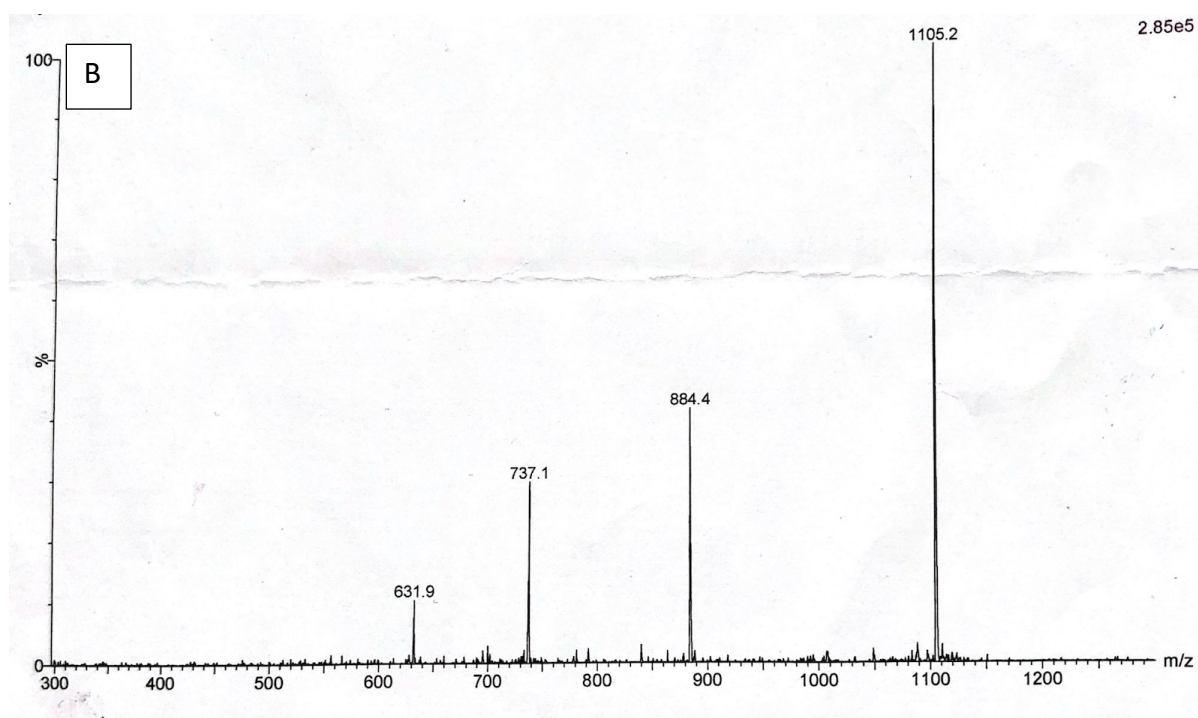

**Figure S1.** (A): RP-HPLC profile of synthetic H-B2. (B): ESI-MS spectra of synthetic H-B2.

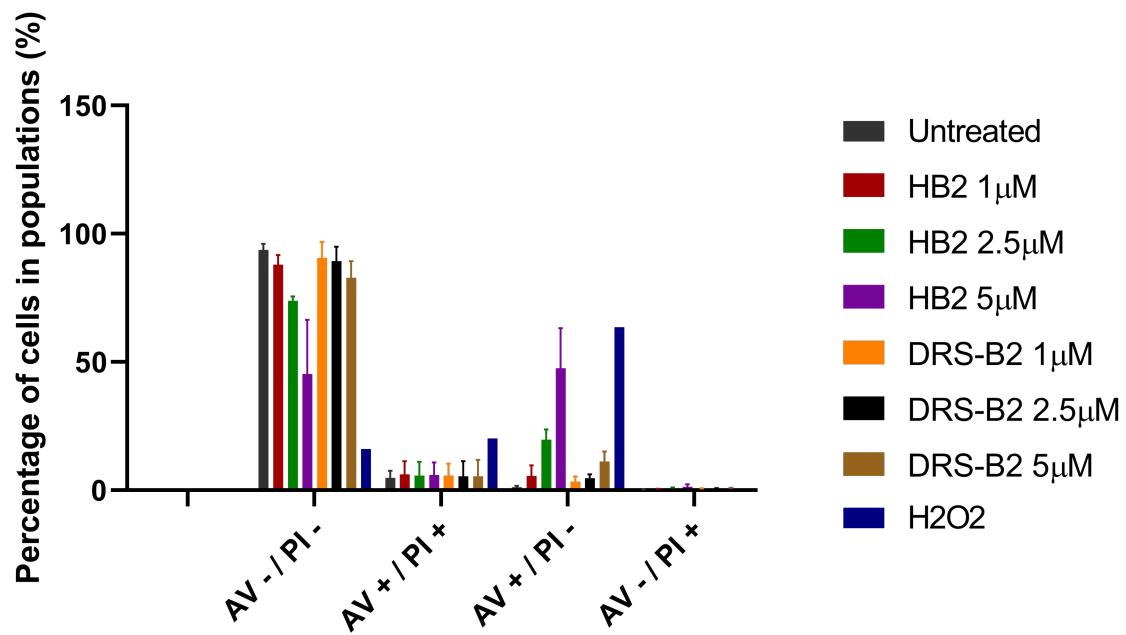

Figure S2: Histogram of each population obtained by flow cytometry in the different conditions (n=3).
